# Supplementary material for: Restriction of photoinduced electron transfer as a mechanism for the aggregation-induced emission of a trityl-functionalised maleimide fluorophore
Source: Royal Society of Chemistry journal article supplement (doi:10.1039/d2cp05194j), 2023-01-01
Supplement: d2cp05194j1.pdf [file d2cp05194j1.pdf]

## Restriction of photoinduced electron transfer as a mechanism for aggregation-induced emission of trityl-functionalised maleimide fluorophore

Weijie Chi\* and Ping-Ping Sun\*

Department of Chemistry, School of Science, Hainan University, Haikou 570228, China

\*Corresponding author E-mail: [weijie\\_chi@hainanu.edu.cn](mailto:weijie_chi@hainanu.edu.cn) (W. Chi)

E-mail: [pingpingsun@hainanu.edu.cn](mailto:pingpingsun@hainanu.edu.cn) (P. Sun)

### List of Figure

|                                                                                                                                                                                                                                                            |   |
|------------------------------------------------------------------------------------------------------------------------------------------------------------------------------------------------------------------------------------------------------------|---|
| Figure S1. The distributions of electron and hole of <b>BzMAM</b> in VES and AES, VES and AES denoted vertically excited state and adiabatic excited state, respectively. ....                                                                             | 2 |
| Figure S2. The distributions of electron and hole of <b>Bz<sub>2</sub>MAM</b> in VES and AES, VES and AES denoted vertically excited state and adiabatic excited state, respectively. ....                                                                 | 3 |
| Figure S3. The distributions of electron and hole of <b>Bz<sub>3</sub>MAM</b> in VES and AES, VES and AES denoted vertically excited state and adiabatic excited state, respectively. ....                                                                 | 3 |
| Figure S4. Calculated relative electronic energies in the ground and excited states of Bz <sub>3</sub> MAM in water at M062X/TZVP level. ....                                                                                                              | 4 |
| Figure S5. The difference in energies of low-lying excited state and ground state. ....                                                                                                                                                                    | 4 |
| Figure S6. The distributions of HOMO and LUMO in <b>Bz<sub>3</sub>MAM</b> in aggregates. ....                                                                                                                                                              | 5 |
| Figure S7. (a) the ONION model of dimeric Bz <sub>3</sub> MAM in aggregate, (b) the excited-state potential energy surface in aggregate, (c) the distributions of HOMO and LUMO of Bz <sub>3</sub> MAM based on the excited-state structure of dimer. .... | 5 |
| Figure S8. (a) optimized dimeric configuration of Bz <sub>3</sub> MAM, (b) isosurface maps of IRI for Bz <sub>3</sub> MAM-Dimer at M062X/TZVP level. ....                                                                                                  | 6 |
| Figure S9. The diagram of complex structures BzMAM-MeOH, Bz <sub>2</sub> MAM-MeOH, and Bz <sub>3</sub> MAM-MeOH. ....                                                                                                                                      | 6 |
| Figure S10. Two possible structures and relative energies of complexes in <b>Bz<sub>3</sub>MAM-MeOH</b> . ....                                                                                                                                             | 7 |

$$RMSD = \sqrt{\frac{1}{N} \sum_i^{natom} [(x_i - x'_i)^2 + (y_i - y'_i)^2 + (z_i - z'_i)^2]} \quad \text{Equation 1}$$

where the  $x_i$ ,  $y_i$ , and  $z_i$ , denote the coordinates of the first molecule, and  $x'_i$ ,  $y'_i$ , and  $z'_i$  represent the coordinates of the second molecule.

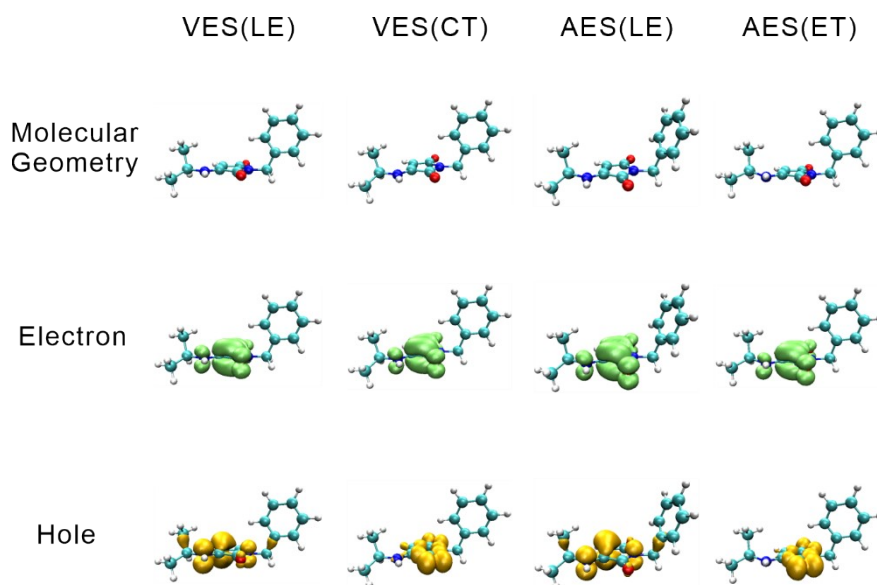

Figure S1. The distributions of electron and hole of **BzMAM** in VES and AES, VES and AES denoted vertically excited state and adiabatic excited state, respectively.

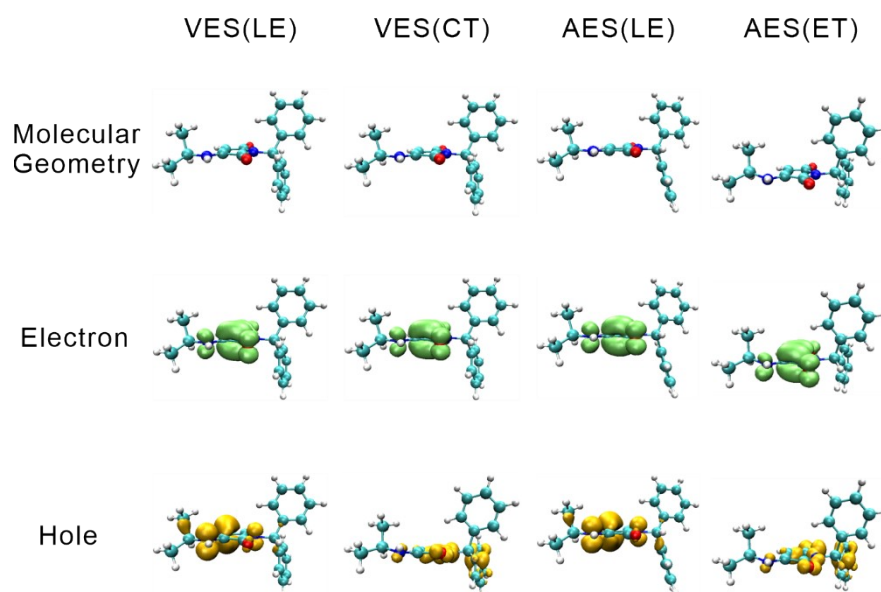

Figure S2. The distributions of electron and hole of **Bz<sub>2</sub>MAM** in VES and AES, VES and AES denoted vertically excited state and adiabatic excited state, respectively.

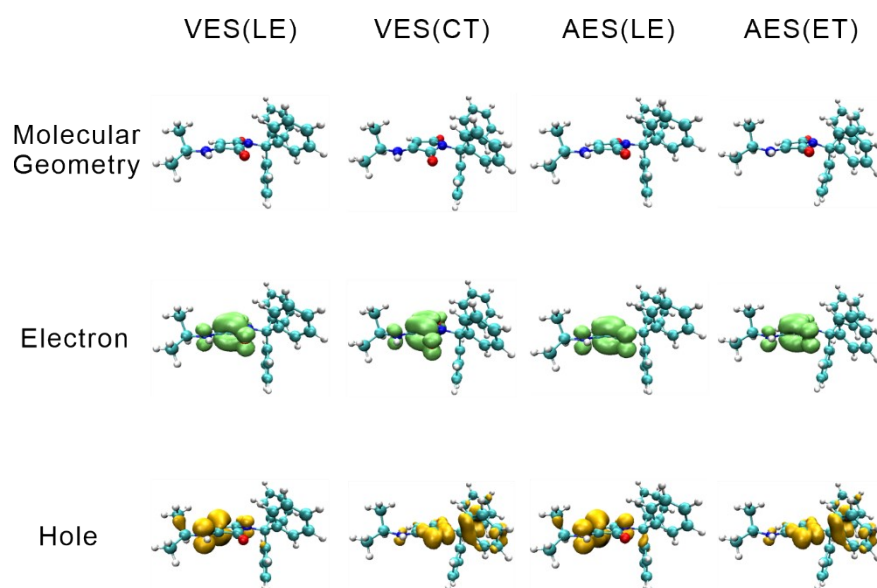

Figure S3. The distributions of electron and hole of **Bz<sub>3</sub>MAM** in VES and AES, VES and AES denoted vertically excited state and adiabatic excited state, respectively.

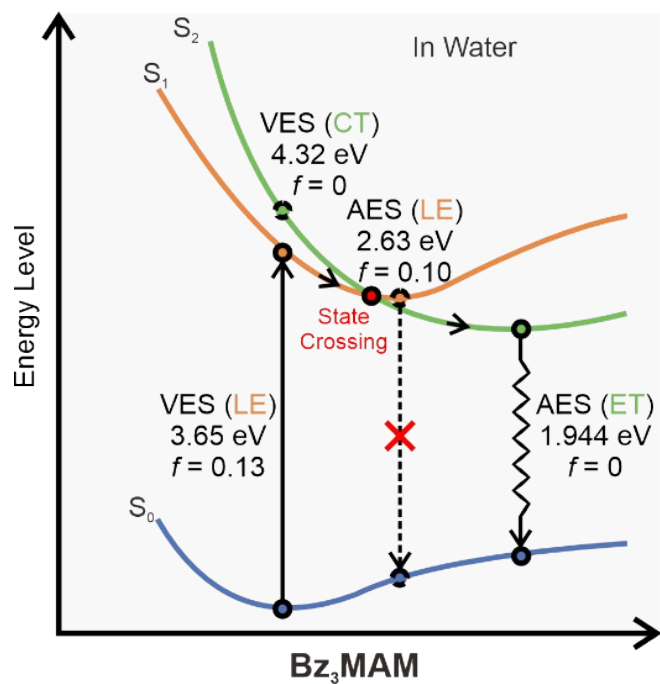

Figure S4 Calculated relative electronic energies in the ground and excited states of Bz<sub>3</sub>MAM in water at M062X/TZVP level.

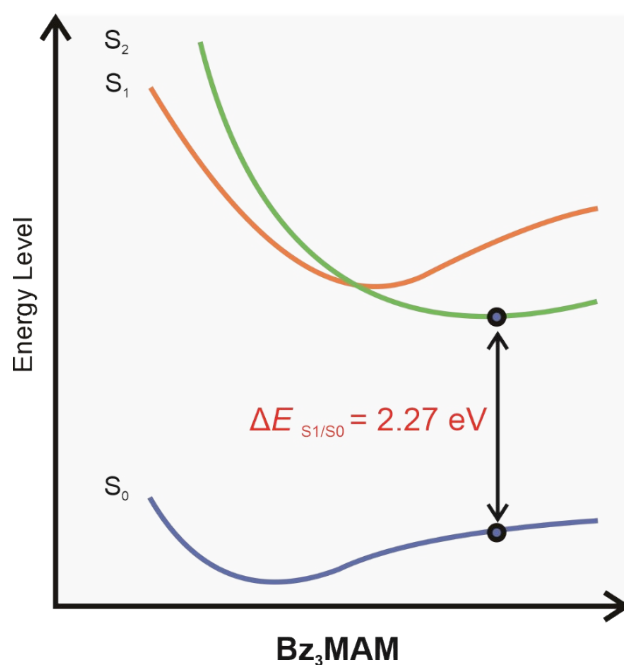

Figure S5. The difference in energies of low-lying excited state and ground state.

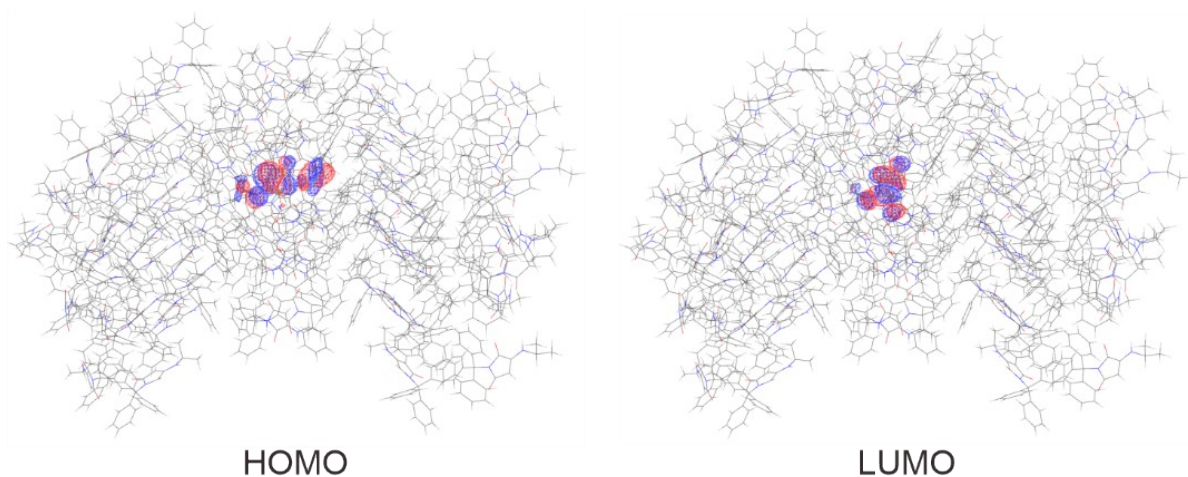

Figure S6. The distributions of HOMO and LUMO in **Bz<sub>3</sub>MAM** in aggregates.

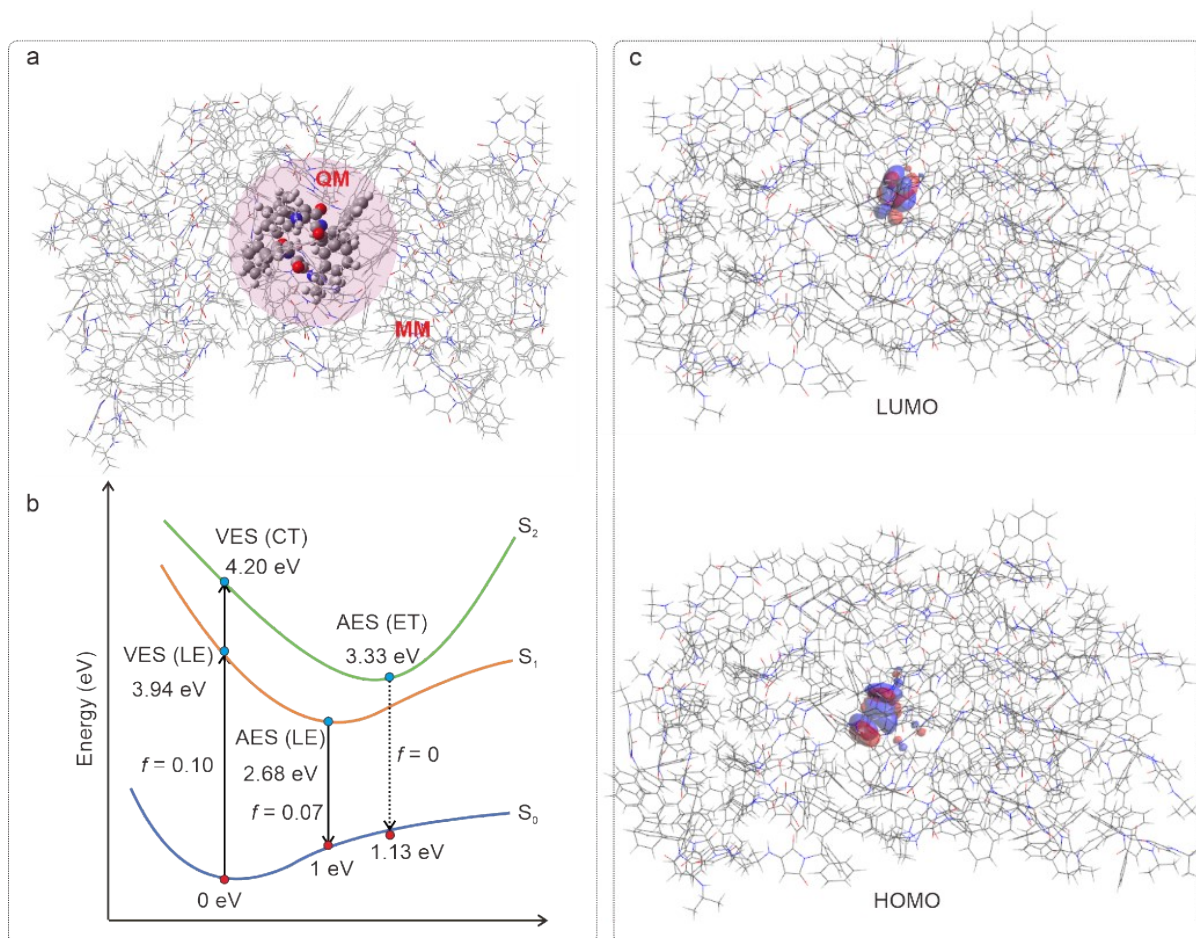

Figure S7. (a) the ONION model of dimeric **Bz<sub>3</sub>MAM** in aggregate, (b) the excited-state potential energy surface in aggregate, (c) the distributions of HOMO and LUMO of **Bz<sub>3</sub>MAM** based on the excited-state structure of dimer.

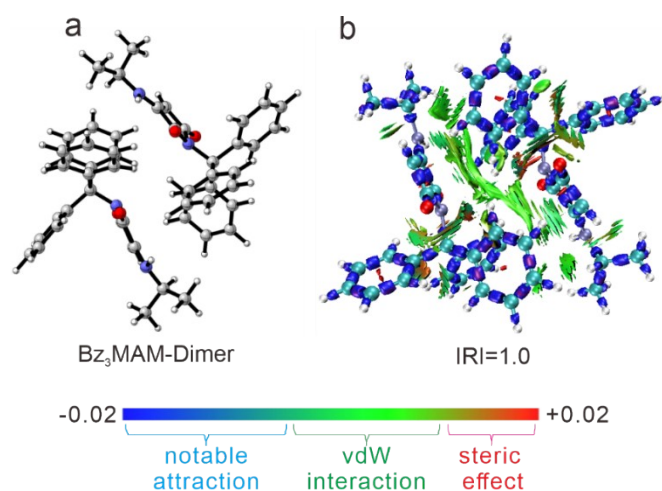

Figure S8. (a) optimized dimeric configuration of Bz<sub>3</sub>MAM, (b) isosurface maps of interaction region indicator (IRI) for Bz<sub>3</sub>MAM-Dimer at M062X/TZVP level, which was calculated using Multiwfn 3.7 code. The blue, green, and red denote the notable attraction, vdW interaction, and steric effect, respectively.

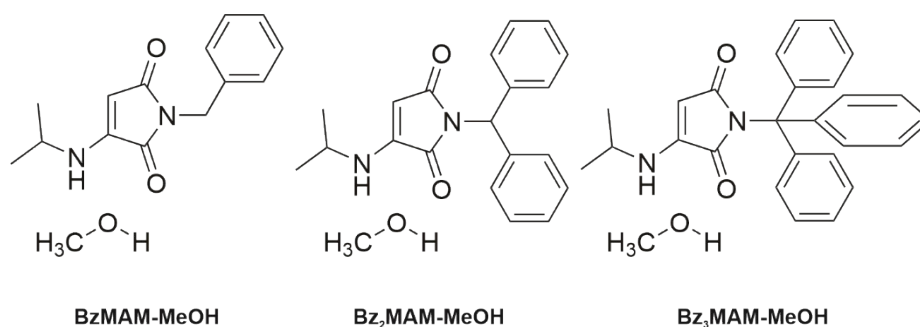

Figure S9. The diagram of complex structures BzMAM-MeOH, Bz<sub>2</sub>MAM-MeOH, and Bz<sub>3</sub>MAM-MeOH.

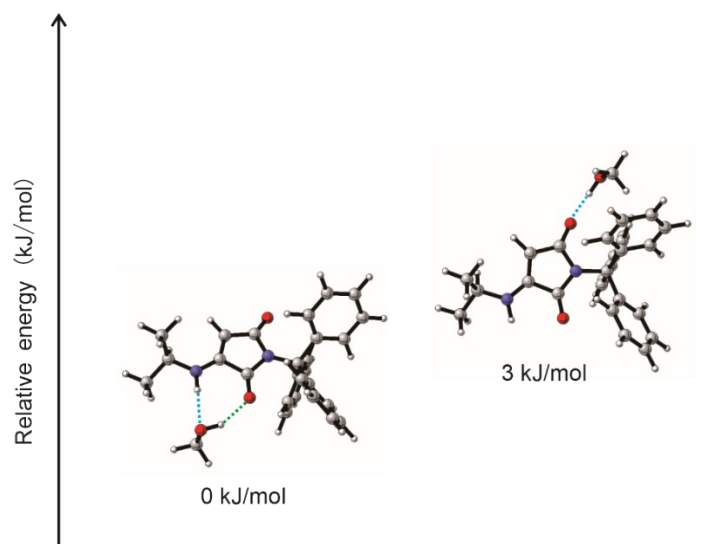

Figure S10. Two possible structures and relative energies of complexes in **Bz<sub>3</sub>MAM-MeOH**.
